# Supplementary material for: Hydrothermal crystal engineering using hard and soft acids and bases: synthesis and X-ray crystal structures of the metal hydroxide-based phases M3M′2(OH)2[NC5H3(CO2)2-2,4]4(H2O)4 (M = Co, Ni, Zn; M′ = Pd, Pt)
Source: Royal Society of Chemistry journal article supplement (doi:10.1039/b006094l), 2000-01-01
Supplement: b006094l.doc [file b006094l.doc]

Hydrothermal crystal engineering using hard and soft acids and bases: synthesis and X-ray crystal structures of the metal hydroxide-based phases M3M'2(OH)2(NC5H3(CO2)2-2,4)4(H2O)4 M=Co, Ni, Zn; M'=Pd, Pt.

# Lee A Gerrard and Paul T Wood*

**Supplementary data.**

**Microanalysis data for all six compounds.**

| **Compound** | **Theoretical %** | | | **Found %** | | |
| --- | --- | --- | --- | --- | --- | --- |
|  | C | H | N | C | H | N |
| **1a** | 29.09 | 1.92 | 4.85 | 29.01 | 1.76 | 4.82 |
| **2a** | 29.09 | 1.92 | 4.85 | 29.08 | 1.82 | 4.82 |
| **3a** | 28.61 | 1.89 | 4.77 | 29.27 | 1.87 | 4.87 |
| **1b** | 25.22 | 1.66 | 4.20 | 25.27 | 1.53 | 4.19 |
| **2b** | 25.22 | 1.66 | 4.20 | 25.20 | 1.62 | 4.16 |
| **3b** | 24.86 | 1.64 | 4.14 | 24.79 | 1.52 | 4.11 |

**Infrared data, KBr plates, for all six compound, showing relevant peaks.**

| **Compound** | **Stretch max / cm-1** | | | | |
| --- | --- | --- | --- | --- | --- |
|  | (3-OH) *m sp* | (OH) *s br* | (C=O) *vs sp* | (C=O) *vs sp* | (C=O) *vs sp* |
| **1a** | 3598.36 | 3346.08 | 1687.36 | 1647.57 | 1610.55 |
| **2a** | 3603.83 | 3298.88 | 1687.65 | 1647.50 | 1608.53 |
| **3a** | 3605.97 | 3361.14 | 1686.88 | 1645.83 | 1611.11 |
| **1b** | 3598.39 | 3295.47 | 1695.12 | 1654.11 | 1606.90 |
| **2b** | 3604.31 | 3301.89 | 1695.98 | 1655.39 | 1606.71 |
| **3b** | 3606.47 | 3335.36 | 1694.94 | 1655.23 | 1608.49 |

# **Unit cell parameters for other metal equivalents.**

| **compound** | A (Å) | B (Å) | C (Å) |  (º) |  (º) |  (º) | V (Å3) |
| --- | --- | --- | --- | --- | --- | --- | --- |
| **1b** | 6.521(7) | 7.975(3) | 16.486(3) | 76.78(2) | 88.92(3) | 85.42(4) | 867 |
| **2a** | 6.9(2) | 8.1(1) | 16.9(3) | 79.8(7) | 89.2(1) | 85.1(1) | 943 |
| **2b** | 6.49(1) | 7.99(1) | 16.52(5) | 75.76(2) | 88.17(2) | 85.00(5) | 854 |
| **3b** | 6.510(1) | 8.026(3) | 16.530(6) | 76.18(3) | 89.30(2) | 84.79(1) | 835.2 |

**Selected bond lengths and angles**

Selected bond lengths for **1a**: Pd1-N1 2.013(3), Pd1-N2 1.986(3), Pd1-O1 1.976(3), Pd1-O5 2.004(3), Co1-O3 2.067(3), Co1-O8a 2.094(3), Co1-O11a 2.082(3), Co1-O11 2.097(2), Co1-O10 2.120(3), Co1-O9 2.171(2), Co2-O11 2.045(2), Co2-O7a 2.115(3), Co2-O4 2.134(2) Å.

Selected bond angles for **1a**: N2-Pd1-O1 95.0(1), N2-Pd1-N1 177.7(1), O1-Pd1-N1 82.8(1), N2-Pd1-O5 82.2(1), O1-Pd1-O5 177.2(1), N1-Pd1-O5 100.0(1),O3-Co1-O8a 174.1(1), O3-Co1-O11a 91.5(1), O3-Co1-O11 95.7(1), O3-Co1-O10 90.8(1), O3-Co1-O9 83.6(1), O8a-Co1-O11 89.3(1), O8a-Co1-O11a 92.2(1), O8a-Co1-O9 91.7(1), O8a-Co1-O10 85.8(1), O11a-Co1-O11 85.1(1), O11a-Co1-O10 176.8(1), O11a-Co1-O9 90.7(1), O9-Co1-O10 91.9(1), O9-Co1-O11 175.8(1), O10-Co1-O11 92.3(1), O4-Co2-O11b 86.8(1), O4-Co2-O11 93.2(1), O4-Co2-O7b 89.3(1), O4a-Co2-O7a 89.3(1), O4a-Co2-O7b 90.7(1), O4a-Co2-O11b 93.2(1), O11-Co2-O7a 86.4(1), O11-Co2-O7b 93.6(1) Co1-O11-Co1a 94.9(1), Co1-O11-Co2 120.5(1), Co1-O11-Co2a 121.2(1) ˚.

Selected bond lengths for **3a**: Pd1-N1 2.017(5), Pd1-N2 1.986(4), Pd1-O1 2.000(4), Pd1-O5 2.032(4), Zn1-O3 2.080(4), Zn1-O8a 2.098(4), Zn1-O11a 2.105(4), Zn1-O11 2.142(4), Zn1-O10 2.146(4), Zn1-O9 2.231(4), Zn2-O11a 2.033(3), Zn2-O7a 2.150(4), Zn2-O4 2.193(4), Å.

Selected bond angles for **3a**: N2-Pd1-O1 95.1(2), N2-Pd1-N1 177.4(2), O1-Pd1-N1 82.5(2), N2-Pd1-O5 82.3(2), O1-Pd1-O5 177.29(2), N1-Pd1-O5 100.1(2), O3-Zn1-O8a 172.1(2), O3-Zn1-O11a 92.1(2), O3-Zn1-O11 96.91(2), O3-Zn1-O10 90.8(2), O3-Zn1-O9 82.2(2), O8a-Zn1-O11 90.1(2), O8a-Zn1-O11a 92.1(2), O8a-Zn1-O9 91.0(2), O8a-Zn1-O10 85.2(2), O11a-Zn1-O11 84.6(1), O11a-Zn1-O10 176.8(2), O11a-Zn1-O9 91.1(1), O9-Zn1-O10 90.6(2), O9-Zn1-O11 175.6(1), O10-Zn1-O11 93.7(2), O4-Zn2-O11b 87.2(1), O4-Zn2-O11 92.9(1), O4-Zn2-O7b 90.3(2), O4a-Zn2-O7a 90.3(2), O4a-Zn2-O7b 89.7(2), O4a-Zn2-O11b 92.9(1), O11-Zn2-O7a 86.8(1), O11-Zn2-O7b 93.2(1), Zn1-O11-Zn1a 95.4(1), Zn1-O11-Zn2 120.3(2), Zn1-O11-Zn2a 122.2(2) ˚.
